# Supplementary material for: Caspase Inhibition in Select Olfactory Neurons Restores Innate Attraction Behavior in Aged Drosophila
Source: PubMed Central journal article supplement (PMC4072539; doi:10.1371/journal.pgen.1004437), 2014-06-26

# Figure S1

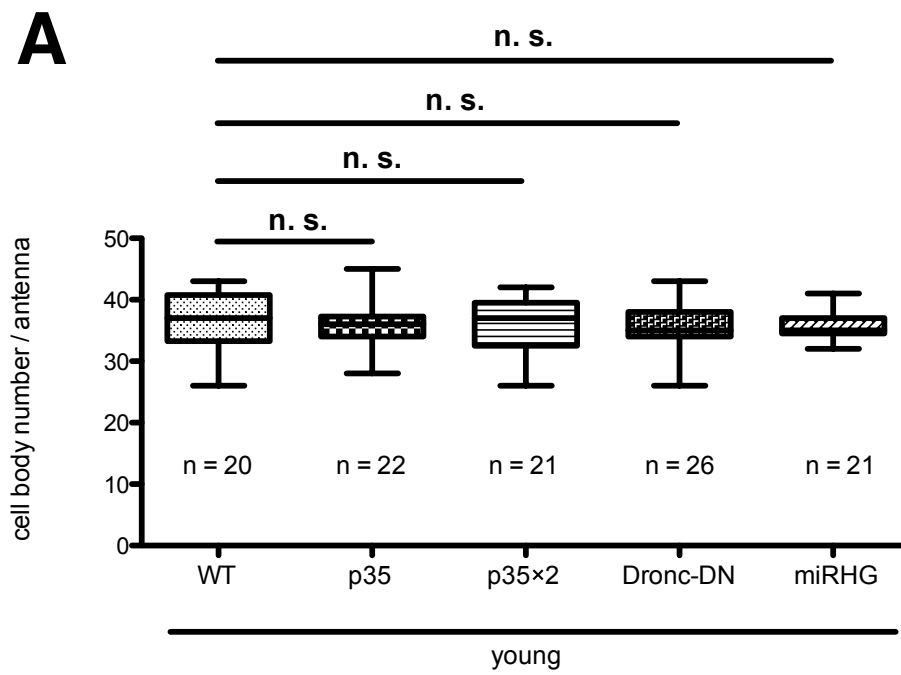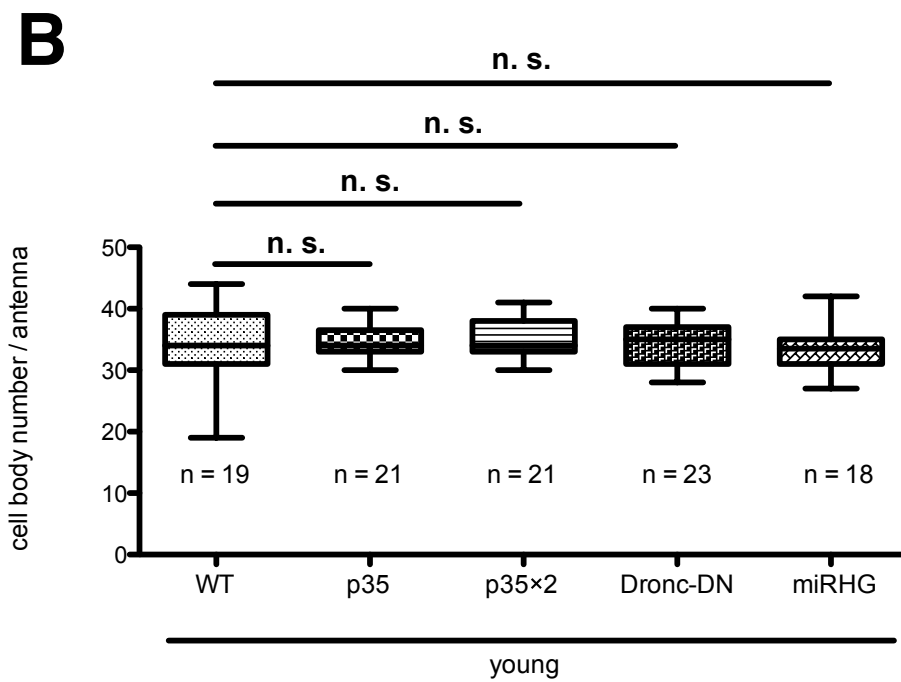

Supplement: pgen.1004437.s001.pdf [file pgen.1004437.s001.pdf]
